# Supplementary material
Source: PubMed Central journal article supplement (PMC8055783)
Supplement: 12298_2021_979_MOESM1_ESM.pdf [file 12298_2021_979_MOESM1_ESM.pdf]

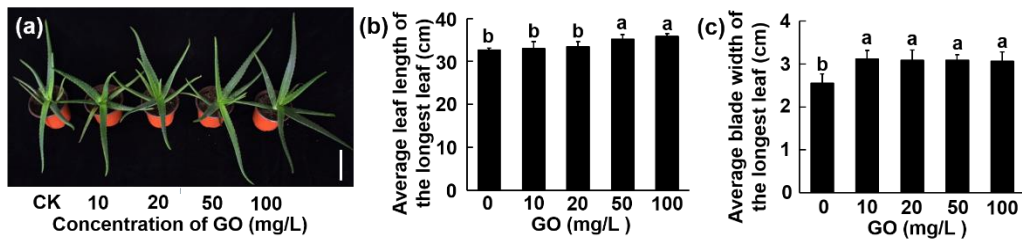

**Fig. S1** Phenotype of *Aloe vera* seedlings exposed to GO solution at different concentrations (0-100 mg/L) for 4 months. (a) Photo of *Aloe vera* grown in soil after GO treatments (scale bar: 10 cm), (b) Average leaf length of the longest leaf, (c) Average blade width of the longest leaf. Values are means  $\pm$  SD (n = 5). Means with different letters are significantly different by LSD test ( $p \leq 0.05$ ).

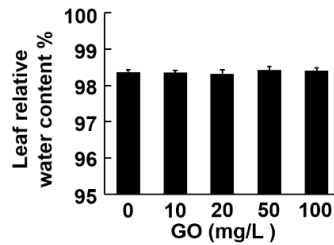

**Fig. S2** Leaf relative water content of *Aloe vera* seedlings exposed to GO solution at different concentrations (0-100 mg/L) for 4 months. Values are means  $\pm$  SD (n = 5), LSD test ( $p \leq 0.05$ ).
